# Supplementary material for: Sugar Beet Molasses as a Potential C-Substrate for PHA Production by Cupriavidus necator
Source: MDPI journal article supplement (doi:10.3390/bioengineering9040154), 2022-04-04
Supplement: s1 [file s1]

# Supplementary Materials: Sugar beet molasses as a potential C-substrate for PHA production by a wild strain *Cupriavidus necator*

Evgeniy G. Kiselev, Aleksey V. Demidenko, Natalia O. Zhila , Ekaterina I. Shishatskaya and Tatiana G. Volova

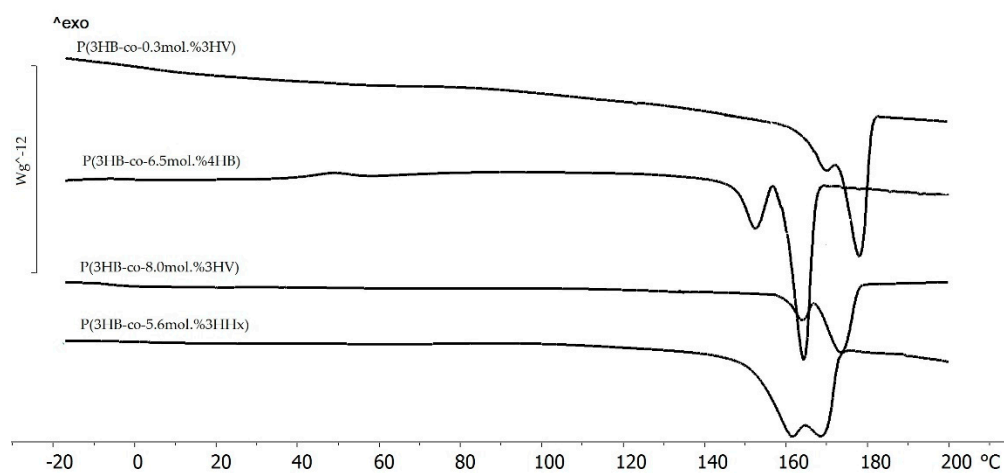

**Figure S1.** Results of thermal analysis of PHAs synthesized by *Cupriavidus necator* B-10646 from molasses hydrolysate.
